# Supplementary material
Source: publisher site journal article supplement (https://www.dovepress.com/article/443152)
Supplement: Supplementary file 1 [file get_supplementary_file.php]

**Appendix**

Some research questions about multimorbidity that might inspire the workshop were elucidated by the UK-based Academy of Medical Sciences.1 These might be refocused with an eye on the role of health inequalities.

*Research priority 1:* What are the trends and patterns in multimorbidity?

*Research priority 2:* Which multimorbidity clusters cause the greatest burden?

*Research priority 3:* What are the determinants of the most common clusters of conditions?

*Research priority 4:* What strategies are best able to facilitate the simultaneous or stepwise prevention of chronic conditions that contribute to the most common multimorbidity clusters?

*Research priority 5:* What strategies are best able to maximise the benefits and limit the risks of treatment among patients with multimorbidity?

*Research priority 6:* How can healthcare systems be better organised to maximise the benefits and limit the risks for patients with multimorbidity?

**References**

1. Academy of Medical Sciences. Multimorbidity: a priority for global health research https://acmedsci.ac.uk/file-download/82222577 Accessed January 6., 2023.
